# Supplementary material for: Promoting an active form of learning out-of-class via answering online “study questions” leads to higher than expected exam scores in General Biology
Source: PeerJ. 2015 Oct 8;3:e1322. doi: 10.7717/peerj.1322 (PMC4614910; doi:10.7717/peerj.1322)
Supplement: Table S2 — The numbers of study questions, quiz questions and total questions (study plus quiz questions) answered by each student in preparation for exams 1 and 2 during 2012 are shown. The overall exam 1 and 2 scores for each student are also indicated. In addition, the scores on different groups of exam 2 questions are shown. “Exam 2 study questions” refers to questions on exam 2 that were taken directly from the online study questions. “Questions on same material” refers to questions covering the same material covered by the online study questions; these questions were chosen by the author from the exam question database maintained by the Biology Program at the University of Minnesota (thus these questions were not written by the author). “Questions on other material” refer to questions on material not covered by the study questions; these questions were chosen by a different faculty member. [file peerj-03-1322-s002.xlsx]

## Sheet: Study vs quiz questions 2012
Supplemental Table S2. Numbers of study and quiz questions answered and exam scores in 2012. The numbers of study questions, quiz questions and total questions (study plus quiz questions) answered by each student in preparation for exams 1 and 2 during 2012 are indicated. Exam scores are shown as the percentage of questions that were answered correctly. The overall exam 1 and 2 scores for each st…
# of study questions answered in preparation for exam 1	# of quiz questions answered in preparation for exam 1	Total # of questions answered in preparation for exam 1	# of study questions answered in preparation for exam 2	# of quiz questions answered in preparation for exam 2	Total # of questions answered in preparation for exam 2	Overall exam 1 score	Score on exam 2 study questions	Score on exam 2 questions on same material	Score on exam 2 questions on other material	Overall exam 2 score
553	264	817	154	216	370	27.5	53.3333	41.6667	30.7692	42.5
164	96	260	136	48	184	57.5	80	50	23.0769	52.5
367	264	631	22	168	190	47.5	53.3333	41.6667	23.0769	40
207	120	327	84	72	156	55	73.3333	66.6667	38.4615	60
300	264	564	208	144	352	45	13.3333	41.6667	46.1538	32.5
130	72	202	85	24	109	22.5	53.3333	58.3333	46.1538	52.5
549	264	813	0	216	216	62.5	93.3333	83.3333	46.1538	75
450	216	666	430	96	526	65	66.6667	75	15.3846	52.5
130	192	322	144	120	264	45	33.3333	75	30.7692	45
858	240	1098	656	192	848	50	60	58.3333	15.3846	45
891	264	1155	1011	216	1227	55	60	83.3333	46.1538	62.5
230	168	398	321	120	441	32.5	60	41.6667	30.7692	45
180	192	372	166	120	286	45	53.3333	41.6667	38.4615	45
340	192	532	50	24	74	47.5	33.3333	33.3333	38.4615	35
134	96	230	18	24	42	52.5	40	50	23.0769	37.5
90	288	378	50	120	170	57.5	93.3333	83.3333	76.9231	85
50	168	218	0	72	72	60	60	66.6667	38.4615	55
340	264	604	93	72	165	72.5	60	50	38.4615	50
50	96	146	0	48	48	35	40	58.3333	38.4615	45
250	120	370	18	48	66	55	20	33.3333	38.4615	30
750	264	1014	82	168	250	60	60	41.6667	30.7692	45
357	264	621	1233	192	1425	60	73.3333	25	30.7692	45
100	48	148	75	0	75	35	40	58.3333	23.0769	40
110	120	230	46	144	190	50	40	66.6667	30.7692	45
177	192	369	202	96	298	50	66.6667	75	30.7692	57.5
210	144	354	222	120	342	57.5	80	91.6667	30.7692	67.5
728	240	968	509	120	629	65	80	58.3333	23.0769	55
971	192	1163	428	168	596	40	60	58.3333	46.1538	55
0	264	264	110	168	278	60	46.6667	66.6667	38.4615	50
314	264	578	180	216	396	62.5	66.6667	58.3333	46.1538	57.5
167	96	263	80	72	152	72.5	46.6667	66.6667	23.0769	45
221	216	437	175	120	295	80	46.6667	25	53.8462	42.5
704	288	992	333	96	429	87.5	80	58.3333	38.4615	60
310	96	406	0	0	0	47.5	46.6667	25	23.0769	32.5
260	216	476	20	192	212	47.5	73.3333	75	30.7692	60
67	96	163	0	72	72	52.5	53.3333	33.3333	23.0769	37.5
609	216	825	649	144	793	57.5	73.3333	58.3333	30.7692	55
396	192	588	252	192	444	67.5	86.6667	50	46.1538	62.5
321	192	513	474	120	594	67.5	80	66.6667	38.4615	62.5
120	264	384	130	216	346	50	60	91.6667	23.0769	57.5
380	216	596	488	72	560	52.5	66.6667	50	30.7692	50
410	288	698	751	216	967	60	86.6667	66.6667	38.4615	65
350	168	518	358	96	454	62.5	60	75	38.4615	57.5
355	240	595	443	72	515	65	53.3333	50	23.0769	42.5
164	192	356	54	120	174	65	60	83.3333	23.0769	55
510	288	798	700	144	844	67.5	53.3333	50	23.0769	42.5
891	288	1179	1270	120	1390	67.5	73.3333	66.6667	46.1538	62.5
240	168	408	320	72	392	67.5	60	91.6667	38.4615	62.5
120	96	216	119	24	143	70	46.6667	50	61.5385	52.5
1289	240	1529	771	144	915	70	73.3333	75	38.4615	62.5
27	240	267	0	120	120	72.5	60	75	61.5385	65
465	192	657	258	24	282	75	60	66.6667	38.4615	55
641	264	905	805	120	925	55	86.6667	50	15.3846	52.5
437	264	701	214	96	310	57.5	66.6667	58.3333	46.1538	57.5
381	216	597	228	192	420	57.5	66.6667	58.3333	61.5385	62.5
565	240	805	177	120	297	60	60	41.6667	38.4615	47.5
484	216	700	444	72	516	60	73.3333	58.3333	23.0769	52.5
0	96	96	0	72	72	62.5	46.6667	66.6667	38.4615	50
262	216	478	58	24	82	67.5	26.6667	25	30.7692	27.5
177	96	273	82	48	130	67.5	53.3333	58.3333	30.7692	47.5
491	264	755	330	216	546	67.5	53.3333	83.3333	53.8462	62.5
341	264	605	136	96	232	70	66.6667	83.3333	15.3846	55
1161	168	1329	795	48	843	80	73.3333	83.3333	30.7692	62.5
880	192	1072	1276	192	1468	80	80	66.6667	53.8462	67.5
300	120	420	584	96	680	85	73.3333	83.3333	30.7692	62.5
630	168	798	270	48	318	42.5	40	41.6667	23.0769	35
60	240	300	124	72	196	45	46.6667	33.3333	46.1538	42.5
144	192	336	291	96	387	50	60	83.3333	46.1538	62.5
476	144	620	386	96	482	52.5	60	50	53.8462	55
50	240	290	0	72	72	60	66.6667	75	38.4615	60
250	120	370	180	72	252	65	66.6667	41.6667	30.7692	47.5
546	288	834	592	168	760	67.5	86.6667	75	53.8462	72.5
30	168	198	90	216	306	70	53.3333	58.3333	30.7692	47.5
631	288	919	509	216	725	87.5	46.6667	75	30.7692	50
80	144	224	40	120	160	45	73.3333	58.3333	46.1538	60
157	192	349	18	96	114	47.5	26.6667	66.6667	23.0769	37.5
587	288	875	1135	72	1207	55	86.6667	58.3333	38.4615	62.5
174	168	342	300	144	444	57.5	60	75	30.7692	55
521	288	809	612	216	828	60	53.3333	66.6667	46.1538	55
374	144	518	436	120	556	62.5	66.6667	66.6667	30.7692	55
320	144	464	10	120	130	65	80	66.6667	15.3846	55
381	288	669	284	216	500	65	86.6667	66.6667	38.4615	65
170	240	410	0	0	0	67.5	33.3333	50	30.7692	37.5
120	72	192	73	48	121	67.5	53.3333	50	30.7692	45
214	144	358	218	144	362	67.5	80	75	38.4615	65
401	216	617	254	96	350	70	60	58.3333	46.1538	55
370	216	586	332	72	404	70	60	41.6667	61.5385	55
10	96	106	18	48	66	70	80	66.6667	46.1538	65
458	144	602	681	72	753	85	86.6667	100	46.1538	77.5
662	216	878	532	144	676	47.5	73.3333	75	30.7692	60
20	96	116	0	48	48	52.5	46.6667	66.6667	46.1538	52.5
220	192	412	191	144	335	60	53.3333	33.3333	46.1538	45
397	168	565	213	120	333	60	53.3333	66.6667	46.1538	55
524	192	716	539	120	659	60	73.3333	83.3333	23.0769	60
729	216	945	664	168	832	60	66.6667	75	53.8462	65
305	216	521	554	168	722	67.5	73.3333	83.3333	30.7692	62.5
404	144	548	399	144	543	70	66.6667	50	30.7692	50
210	96	306	170	72	242	72.5	33.3333	58.3333	38.4615	42.5
1105	264	1369	536	192	728	75	73.3333	75	38.4615	62.5
681	216	897	700	144	844	77.5	66.6667	66.6667	30.7692	55
77	120	197	298	96	394	27.5	53.3333	58.3333	38.4615	50
557	168	725	261	96	357	60	53.3333	75	53.8462	60
372	120	492	403	48	451	62.5	66.6667	75	46.1538	62.5
374	216	590	67	72	139	70	73.3333	91.6667	38.4615	67.5
593	144	737	348	192	540	70	93.3333	83.3333	38.4615	72.5
100	168	268	84	144	228	72.5	60	41.6667	30.7692	45
371	240	611	189	72	261	72.5	73.3333	75	23.0769	57.5
1201	192	1393	1556	216	1772	72.5	60	75	38.4615	57.5
571	240	811	756	96	852	72.5	73.3333	66.6667	46.1538	62.5
435	168	603	170	120	290	77.5	53.3333	58.3333	46.1538	52.5
539	192	731	192	96	288	77.5	53.3333	75	53.8462	60
224	192	416	206	96	302	77.5	60	75	46.1538	60
200	192	392	0	168	168	80	46.6667	83.3333	30.7692	52.5
1308	192	1500	625	72	697	80	53.3333	75	38.4615	55
70	168	238	203	24	227	60	60	75	46.1538	60
665	96	761	374	24	398	75	80	58.3333	23.0769	55
317	216	533	184	144	328	77.5	53.3333	58.3333	53.8462	55
868	192	1060	1164	120	1284	77.5	73.3333	58.3333	38.4615	57.5
437	240	677	794	216	1010	82.5	66.6667	83.3333	30.7692	60
462	216	678	346	192	538	85	73.3333	75	46.1538	65
260	120	380	280	72	352	87.5	86.6667	83.3333	38.4615	70
0	216	216	45	120	165	92.5	86.6667	83.3333	53.8462	75
407	168	575	263	120	383	57.5	86.6667	83.3333	30.7692	67.5
344	240	584	170	168	338	65	60	83.3333	61.5385	67.5
120	96	216	103	72	175	67.5	93.3333	83.3333	46.1538	75
445	144	589	363	72	435	72.5	66.6667	66.6667	23.0769	52.5
445	216	661	379	168	547	72.5	60	66.6667	46.1538	57.5
237	192	429	142	48	190	72.5	66.6667	66.6667	53.8462	62.5
537	216	753	353	192	545	75	86.6667	66.6667	30.7692	62.5
321	192	513	674	144	818	75	80	83.3333	30.7692	65
1842	144	1986	1915	168	2083	77.5	100	91.6667	53.8462	82.5
1386	240	1626	942	216	1158	80	40	41.6667	30.7692	37.5
967	216	1183	617	120	737	80	80	75	30.7692	62.5
458	192	650	257	96	353	82.5	53.3333	75	46.1538	57.5
1156	264	1420	1568	216	1784	90	93.3333	83.3333	38.4615	72.5
154	72	226	126	24	150	42.5	73.3333	75	61.5385	70
640	288	928	727	192	919	55	53.3333	66.6667	38.4615	52.5
335	96	431	168	72	240	57.5	100	83.3333	61.5385	82.5
437	264	701	294	192	486	65	66.6667	83.3333	69.2308	72.5
696	240	936	507	96	603	70	60	66.6667	46.1538	57.5
2207	288	2495	6183	168	6351	75	86.6667	75	30.7692	65
712	168	880	282	72	354	80	73.3333	66.6667	61.5385	67.5
1721	192	1913	1179	120	1299	82.5	86.6667	75	23.0769	62.5
978	192	1170	1005	120	1125	82.5	80	83.3333	53.8462	72.5
90	240	330	90	144	234	45	73.3333	83.3333	38.4615	65
785	264	1049	1024	168	1192	52.5	53.3333	91.6667	61.5385	67.5
90	120	210	20	72	92	55	46.6667	66.6667	53.8462	55
380	72	452	336	48	384	65	60	75	46.1538	60
359	168	527	293	96	389	67.5	66.6667	75	46.1538	62.5
238	96	334	148	48	196	77.5	73.3333	75	53.8462	67.5
380	96	476	576	72	648	80	80	83.3333	38.4615	67.5
734	240	974	653	144	797	87.5	93.3333	91.6667	46.1538	77.5
922	96	1018	652	48	700	95	93.3333	66.6667	38.4615	67.5
120	120	240	249	120	369	50	80	66.6667	69.2308	72.5
300	216	516	390	168	558	65	66.6667	33.3333	38.4615	47.5
177	96	273	299	96	395	72.5	66.6667	91.6667	23.0769	60
502	168	670	486	96	582	72.5	100	100	53.8462	85
210	48	258	274	168	442	80	80	41.6667	53.8462	60
0	192	192	0	96	96	80	60	58.3333	69.2308	62.5
558	168	726	273	96	369	80	66.6667	83.3333	53.8462	67.5
599	264	863	442	168	610	80	80	83.3333	61.5385	75
395	192	587	173	72	245	82.5	60	75	23.0769	52.5
140	216	356	20	72	92	85	60	66.6667	69.2308	65
311	96	407	104	96	200	85	66.6667	91.6667	53.8462	70
1829	264	2093	1826	216	2042	90	93.3333	66.6667	69.2308	77.5
650	120	770	347	120	467	95	93.3333	91.6667	69.2308	85
627	144	771	472	96	568	62.5	80	83.3333	15.3846	60
667	120	787	420	144	564	67.5	80	75	53.8462	70
445	192	637	578	72	650	70	86.6667	75	30.7692	65
10	0	10	0	0	0	70	53.3333	91.6667	61.5385	67.5
694	168	862	370	96	466	72.5	53.3333	66.6667	30.7692	50
664	264	928	759	216	975	72.5	60	66.6667	46.1538	57.5
335	216	551	447	96	543	72.5	80	75	38.4615	65
777	144	921	649	192	841	75	53.3333	41.6667	38.4615	45
200	168	368	27	144	171	75	60	83.3333	69.2308	70
40	168	208	27	72	99	77.5	80	50	76.9231	70
388	288	676	698	168	866	80	93.3333	100	53.8462	82.5
140	240	380	144	120	264	82.5	53.3333	75	30.7692	52.5
799	120	919	616	168	784	82.5	73.3333	91.6667	69.2308	77.5
1373	288	1661	972	168	1140	82.5	93.3333	91.6667	76.9231	87.5
814	240	1054	1044	96	1140	85	73.3333	58.3333	46.1538	60
320	72	392	275	48	323	87.5	73.3333	100	46.1538	72.5
347	168	515	247	168	415	90	73.3333	91.6667	69.2308	77.5
1836	144	1980	1553	120	1673	90	80	91.6667	61.5385	77.5
1170	168	1338	1006	144	1150	90	86.6667	75	84.6154	82.5
686	216	902	722	192	914	92.5	93.3333	100	61.5385	85
215	96	311	225	48	273	95	100	100	76.9231	92.5
200	192	392	231	120	351	62.5	80	50	15.3846	50
130	144	274	30	96	126	70	60	91.6667	69.2308	72.5
685	240	925	1301	216	1517	70	86.6667	100	69.2308	85
488	120	608	534	72	606	77.5	60	50	30.7692	47.5
481	264	745	419	120	539	77.5	86.6667	75	61.5385	75
297	264	561	386	144	530	77.5	93.3333	100	61.5385	85
80	144	224	130	120	250	80	66.6667	66.6667	30.7692	55
281	72	353	200	96	296	80	73.3333	66.6667	76.9231	72.5
301	264	565	377	216	593	80	100	83.3333	61.5385	82.5
545	144	689	593	72	665	80	80	91.6667	92.3077	87.5
1137	168	1305	1175	168	1343	87.5	86.6667	83.3333	46.1538	72.5
250	144	394	324	72	396	90	93.3333	66.6667	46.1538	70
1737	216	1953	1429	168	1597	95	93.3333	75	46.1538	72.5
391	216	607	304	72	376	70	66.6667	66.6667	46.1538	60
220	72	292	404	72	476	72.5	86.6667	91.6667	15.3846	65
90	72	162	0	0	0	72.5	53.3333	83.3333	69.2308	67.5
463	96	559	872	72	944	77.5	73.3333	83.3333	53.8462	70
1468	240	1708	965	202	1167	80	93.3333	58.3333	38.4615	65
741	96	837	628	192	820	80	86.6667	91.6667	69.2308	82.5
561	96	657	288	96	384	82.5	93.3333	83.3333	46.1538	75
917	168	1085	556	168	724	85	86.6667	83.3333	53.8462	75
50	168	218	152	72	224	85	100	100	53.8462	85
1320	288	1608	1214	216	1430	85	100	91.6667	76.9231	90
461	144	605	266	168	434	87.5	100	91.6667	69.2308	87.5
767	264	1031	1140	168	1308	90	93.3333	100	61.5385	85
671	192	863	764	144	908	92.5	100	100	53.8462	85
340	288	628	1107	216	1323	65	66.6667	50	46.1538	55
394	192	586	314	96	410	70	60	75	69.2308	67.5
1280	240	1520	1615	144	1759	72.5	80	83.3333	61.5385	75
464	192	656	296	144	440	75	86.6667	91.6667	53.8462	77.5
1077	240	1317	1362	216	1578	80	73.3333	83.3333	61.5385	72.5
385	168	553	280	48	328	82.5	60	91.6667	84.6154	77.5
431	144	575	346	96	442	85	86.6667	91.6667	53.8462	77.5
381	240	621	267	96	363	85	93.3333	91.6667	76.9231	87.5
563	264	827	232	192	424	87.5	66.6667	75	69.2308	70
849	216	1065	471	96	567	87.5	86.6667	100	53.8462	80
2157	192	2349	2954	216	3170	90	80	91.6667	46.1538	72.5
1521	288	1809	1293	192	1485	92.5	80	91.6667	46.1538	72.5
764	240	1004	574	216	790	92.5	86.6667	83.3333	61.5385	77.5
551	288	839	586	72	658	92.5	100	83.3333	53.8462	80
654	264	918	532	216	748	92.5	93.3333	100	46.1538	80
1286	216	1502	723	144	867	92.5	93.3333	91.6667	84.6154	90
237	144	381	563	72	635	75	80	83.3333	23.0769	62.5
237	240	477	520	168	688	80	93.3333	100	61.5385	85
261	240	501	224	144	368	82.5	86.6667	83.3333	30.7692	67.5
906	216	1122	904	168	1072	82.5	93.3333	91.6667	76.9231	87.5
790	288	1078	790	216	1006	85	93.3333	83.3333	61.5385	80
264	144	408	107	144	251	85	93.3333	91.6667	61.5385	82.5
574	264	838	174	72	246	87.5	73.3333	75	30.7692	60
187	264	451	249	144	393	87.5	100	91.6667	92.3077	95
521	144	665	436	72	508	90	80	66.6667	53.8462	67.5
300	264	564	88	168	256	90	73.3333	100	76.9231	82.5
1144	168	1312	464	96	560	92.5	86.6667	91.6667	61.5385	80
1951	168	2119	1281	216	1497	97.5	100	100	84.6154	95
552	288	840	407	168	575	75	73.3333	100	38.4615	70
171	216	387	186	96	282	80	86.6667	91.6667	76.9231	85
307	288	595	108	96	204	82.5	73.3333	75	61.5385	70
458	288	746	414	192	606	82.5	93.3333	100	69.2308	87.5
247	240	487	347	168	515	85	100	83.3333	92.3077	92.5
1070	144	1214	1053	96	1149	92.5	93.3333	91.6667	38.4615	75
380	240	620	290	216	506	95	100	91.6667	69.2308	87.5
893	216	1109	539	168	707	95	86.6667	83.3333	92.3077	87.5
1153	144	1297	1474	72	1546	95	100	83.3333	76.9231	87.5
541	264	805	439	216	655	95	100	100	92.3077	97.5
685	144	829	515	96	611	97.5	100	91.6667	69.2308	87.5
240	216	456	90	72	162	87.5	60	66.6667	23.0769	50
130	120	250	70	72	142	87.5	73.3333	66.6667	76.9231	72.5
737	168	905	405	96	501	87.5	93.3333	100	61.5385	85
80	72	152	110	48	158	90	66.6667	83.3333	61.5385	70
821	192	1013	372	96	468	92.5	80	75	61.5385	72.5
929	216	1145	757	192	949	92.5	86.6667	100	69.2308	85
1005	168	1173	710	24	734	95	80	91.6667	38.4615	70
619	120	739	378	192	570	95	93.3333	75	92.3077	87.5
1035	168	1203	488	24	512	95	100	100	61.5385	87.5
685	120	805	253	144	397	95	93.3333	100	69.2308	87.5
802	120	922	542	48	590	100	100	100	69.2308	90
816	288	1104	726	144	870	85	93.3333	100	69.2308	87.5
578	240	818	220	192	412	87.5	73.3333	83.3333	69.2308	75
881	144	1025	873	192	1065	87.5	93.3333	91.6667	100	95
780	240	1020	599	216	815	95	93.3333	91.6667	92.3077	92.5
131	120	251	136	144	280	72.5	80	91.6667	53.8462	75
1051	144	1195	1032	72	1104	90	100	83.3333	76.9231	87.5
1166	192	1358	1325	144	1469	92.5	93.3333	100	76.9231	90
270	240	510	479	216	695	92.5	100	100	92.3077	97.5
368	168	536	182	96	278	97.5	100	100	76.9231	92.5
1187	216	1403	1085	216	1301	97.5	100	100	69.2308	90
