# Supplementary material for: Promoting an active form of learning out-of-class via answering online “study questions” leads to higher than expected exam scores in General Biology
Source: PeerJ. 2015 Oct 8;3:e1322. doi: 10.7717/peerj.1322 (PMC4614910; doi:10.7717/peerj.1322)
Supplement: Table S3 — The total numbers of questions (study questions plus quiz questions) answered by each student in preparation for exams 1 and 2 in 2012 and 2013 are indicated. The average number of questions answered per lecture for each student in preparation for exams 1 and 2 are also shown. The questions in preparation for exam 1 covered material from eight lectures and the questions in preparation for exam 2 covered material from six lectures. [file peerj-03-1322-s003.xlsx]

## Sheet: Questions answered 2012-2013
Supplemental Table S3. Total numbers of questions answered in preparation for exams 1 and 2 in 2012-2013. The total numbers of questions (study questions plus quiz questions) answered by each student in preparation for exams 1 and 2 in 2012 and 2013 are indicated. The average number of questions answered per lecture for each student in preparation for exams 1 and 2 are also shown. The questions i…
Year	Course section	Total # of questions answered in preparation for exam 1	# of questions/lecture answered in preparation for exam 1	Total # of questions answered in preparation for exam 2	# of questions/lecture answered in preparation for exam 2
2012	30	10	1.25	0	0
2012	30	162	20.25	0	0
2012	30	406	50.75	0	0
2012	30	410	51.25	0	0
2012	30	230	28.75	42	7
2012	30	116	14.5	48	8
2012	30	146	18.25	48	8
2012	30	106	13.25	66	11
2012	30	370	46.25	66	11
2012	30	96	12	72	12
2012	30	163	20.375	72	12
2012	30	218	27.25	72	12
2012	30	290	36.25	72	12
2012	30	532	66.5	74	12.3333
2012	30	148	18.5	75	12.5
2012	30	478	59.75	82	13.6667
2012	30	210	26.25	92	15.3333
2012	30	356	44.5	92	15.3333
2012	30	192	24	96	16
2012	30	208	26	99	16.5
2012	30	202	25.25	109	18.1667
2012	30	349	43.625	114	19
2012	30	267	33.375	120	20
2012	30	192	24	121	20.1667
2012	30	274	34.25	126	21
2012	30	273	34.125	130	21.6667
2012	30	464	58	130	21.6667
2012	30	590	73.75	139	23.1667
2012	30	250	31.25	142	23.6667
2012	30	216	27	143	23.8333
2012	30	226	28.25	150	25
2012	30	263	32.875	152	25.3333
2012	30	327	40.875	156	26
2012	30	152	19	158	26.3333
2012	30	224	28	160	26.6667
2012	30	456	57	162	27
2012	30	216	27	165	27.5
2012	30	604	75.5	165	27.5
2012	30	392	49	168	28
2012	30	378	47.25	170	28.3333
2012	30	368	46	171	28.5
2012	30	356	44.5	174	29
2012	30	216	27	175	29.1667
2012	30	260	32.5	184	30.6667
2012	30	230	28.75	190	31.6667
2012	30	429	53.625	190	31.6667
2012	30	631	78.875	190	31.6667
2012	30	300	37.5	196	32.6667
2012	30	334	41.75	196	32.6667
2012	30	407	50.875	200	33.3333
2012	30	595	74.375	204	34
2012	30	476	59.5	212	35.3333
2012	30	813	101.625	216	36
2012	30	218	27.25	224	37.3333
2012	30	238	29.75	227	37.8333
2012	30	268	33.5	228	38
2012	30	605	75.625	232	38.6667
2012	30	330	41.25	234	39
2012	30	431	53.875	240	40
2012	30	306	38.25	242	40.3333
2012	30	587	73.375	245	40.8333
2012	30	838	104.75	246	41
2012	30	224	28	250	41.6667
2012	30	1014	126.75	250	41.6667
2012	30	408	51	251	41.8333
2012	30	370	46.25	252	42
2012	30	564	70.5	256	42.6667
2012	30	611	76.375	261	43.5
2012	30	322	40.25	264	44
2012	30	380	47.5	264	44
2012	30	311	38.875	273	45.5
2012	30	264	33	278	46.3333
2012	30	536	67	278	46.3333
2012	30	251	31.375	280	46.6667
2012	30	387	48.375	282	47
2012	30	657	82.125	282	47
2012	30	372	46.5	286	47.6667
2012	30	731	91.375	288	48
2012	30	603	75.375	290	48.3333
2012	30	437	54.625	295	49.1667
2012	30	353	44.125	296	49.3333
2012	30	805	100.625	297	49.5
2012	30	369	46.125	298	49.6667
2012	30	416	52	302	50.3333
2012	30	198	24.75	306	51
2012	30	701	87.625	310	51.6667
2012	30	798	99.75	318	53
2012	30	392	49	323	53.8333
2012	30	533	66.625	328	54.6667
2012	30	553	69.125	328	54.6667
2012	30	565	70.625	333	55.5
2012	30	412	51.5	335	55.8333
2012	30	584	73	338	56.3333
2012	30	354	44.25	342	57
2012	30	384	48	346	57.6667
2012	30	617	77.125	350	58.3333
2012	30	392	49	351	58.5
2012	30	380	47.5	352	58.6667
2012	30	564	70.5	352	58.6667
2012	30	650	81.25	353	58.8333
2012	30	880	110	354	59
2012	30	725	90.625	357	59.5
2012	30	358	44.75	362	60.3333
2012	30	621	77.625	363	60.5
2012	30	501	62.625	368	61.3333
2012	30	240	30	369	61.5
2012	30	726	90.75	369	61.5
2012	30	817	102.125	370	61.6667
2012	30	607	75.875	376	62.6667
2012	30	575	71.875	383	63.8333
2012	30	452	56.5	384	64
2012	30	657	82.125	384	64
2012	30	336	42	387	64.5
2012	30	527	65.875	389	64.8333
2012	30	408	51	392	65.3333
2012	30	451	56.375	393	65.5
2012	30	197	24.625	394	65.6667
2012	30	273	34.125	395	65.8333
2012	30	394	49.25	396	66
2012	30	578	72.25	396	66
2012	30	805	100.625	397	66.1667
2012	30	761	95.125	398	66.3333
2012	30	586	73.25	404	67.3333
2012	30	586	73.25	410	68.3333
2012	30	818	102.25	412	68.6667
2012	30	515	64.375	415	69.1667
2012	30	597	74.625	420	70
2012	30	827	103.375	424	70.6667
2012	30	992	124	429	71.5
2012	30	605	75.625	434	72.3333
2012	30	589	73.625	435	72.5
2012	30	656	82	440	73.3333
2012	30	398	49.75	441	73.5
2012	30	258	32.25	442	73.6667
2012	30	575	71.875	442	73.6667
2012	30	342	42.75	444	74
2012	30	588	73.5	444	74
2012	30	492	61.5	451	75.1667
2012	30	518	64.75	454	75.6667
2012	30	862	107.75	466	77.6667
2012	30	770	96.25	467	77.8333
2012	30	1013	126.625	468	78
2012	30	292	36.5	476	79.3333
2012	30	620	77.5	482	80.3333
2012	30	701	87.625	486	81
2012	30	669	83.625	500	83.3333
2012	30	905	113.125	501	83.5
2012	30	620	77.5	506	84.3333
2012	30	665	83.125	508	84.6667
2012	30	1203	150.375	512	85.3333
2012	30	487	60.875	515	85.8333
2012	30	595	74.375	515	85.8333
2012	30	700	87.5	516	86
2012	30	666	83.25	526	87.6667
2012	30	561	70.125	530	88.3333
2012	30	678	84.75	538	89.6667
2012	30	745	93.125	539	89.8333
2012	30	737	92.125	540	90
2012	30	548	68.5	543	90.5
2012	30	551	68.875	543	90.5
2012	30	753	94.125	545	90.8333
2012	30	755	94.375	546	91
2012	30	661	82.625	547	91.1667
2012	30	518	64.75	556	92.6667
2012	30	516	64.5	558	93
2012	30	596	74.5	560	93.3333
2012	30	1312	164	560	93.3333
2012	30	787	98.375	564	94
2012	30	1065	133.125	567	94.5
2012	30	771	96.375	568	94.6667
2012	30	739	92.375	570	95
2012	30	840	105	575	95.8333
2012	30	670	83.75	582	97
2012	30	922	115.25	590	98.3333
2012	30	565	70.625	593	98.8333
2012	30	513	64.125	594	99
2012	30	1163	145.375	596	99.3333
2012	30	936	117	603	100.5
2012	30	608	76	606	101
2012	30	746	93.25	606	101
2012	30	863	107.875	610	101.667
2012	30	829	103.625	611	101.833
2012	30	968	121	629	104.833
2012	30	381	47.625	635	105.833
2012	30	476	59.5	648	108
2012	30	637	79.625	650	108.333
2012	30	805	100.625	655	109.167
2012	30	839	104.875	658	109.667
2012	30	716	89.5	659	109.833
2012	30	689	86.125	665	110.833
2012	30	878	109.75	676	112.667
2012	30	420	52.5	680	113.333
2012	30	477	59.625	688	114.667
2012	30	510	63.75	695	115.833
2012	30	1500	187.5	697	116.167
2012	30	1018	127.25	700	116.667
2012	30	1109	138.625	707	117.833
2012	30	521	65.125	722	120.333
2012	30	1085	135.625	724	120.667
2012	30	919	114.875	725	120.833
2012	30	1369	171.125	728	121.333
2012	30	1173	146.625	734	122.333
2012	30	1183	147.875	737	122.833
2012	30	918	114.75	748	124.667
2012	30	602	75.25	753	125.5
2012	30	834	104.25	760	126.667
2012	30	919	114.875	784	130.667
2012	30	1004	125.5	790	131.667
2012	30	825	103.125	793	132.167
2012	30	974	121.75	797	132.833
2012	30	1020	127.5	815	135.833
2012	30	513	64.125	818	136.333
2012	30	837	104.625	820	136.667
2012	30	809	101.125	828	138
2012	30	945	118.125	832	138.667
2012	30	921	115.125	841	140.167
2012	30	1329	166.125	843	140.5
2012	30	798	99.75	844	140.667
2012	30	897	112.125	844	140.667
2012	30	1098	137.25	848	141.333
2012	30	811	101.375	852	142
2012	30	676	84.5	866	144.333
2012	30	1502	187.75	867	144.5
2012	30	1104	138	870	145
2012	30	863	107.875	908	151.333
2012	30	902	112.75	914	152.333
2012	30	1529	191.125	915	152.5
2012	30	928	116	919	153.167
2012	30	905	113.125	925	154.167
2012	30	559	69.875	944	157.333
2012	30	1145	143.125	949	158.167
2012	30	698	87.25	967	161.167
2012	30	928	116	975	162.5
2012	30	1078	134.75	1006	167.667
2012	30	677	84.625	1010	168.333
2012	30	1025	128.125	1065	177.5
2012	30	1122	140.25	1072	178.667
2012	30	1195	149.375	1104	184
2012	30	1170	146.25	1125	187.5
2012	30	1054	131.75	1140	190
2012	30	1661	207.625	1140	190
2012	30	1214	151.75	1149	191.5
2012	30	1338	167.25	1150	191.667
2012	30	1626	203.25	1158	193
2012	30	1708	213.5	1167	194.5
2012	30	1049	131.125	1192	198.667
2012	30	875	109.375	1207	201.167
2012	30	1155	144.375	1227	204.5
2012	30	1060	132.5	1284	214
2012	30	1913	239.125	1299	216.5
2012	30	1403	175.375	1301	216.833
2012	30	1031	128.875	1308	218
2012	30	628	78.5	1323	220.5
2012	30	1305	163.125	1343	223.833
2012	30	1179	147.375	1390	231.667
2012	30	621	77.625	1425	237.5
2012	30	1608	201	1430	238.333
2012	30	1072	134	1468	244.667
2012	30	1358	169.75	1469	244.833
2012	30	1809	226.125	1485	247.5
2012	30	2119	264.875	1497	249.5
2012	30	925	115.625	1517	252.833
2012	30	1297	162.125	1546	257.667
2012	30	1317	164.625	1578	263
2012	30	1953	244.125	1597	266.167
2012	30	1980	247.5	1673	278.833
2012	30	1520	190	1759	293.167
2012	30	1393	174.125	1772	295.333
2012	30	1420	177.5	1784	297.333
2012	30	2093	261.625	2042	340.333
2012	30	1986	248.25	2083	347.167
2012	30	2349	293.625	3170	528.333
2012	30	2495	311.875	6351	1058.5
2013	1	292	36.5	24	4
2013	1	108	13.5	36	6
2013	1	294	36.75	42	7
2013	1	48	6	48	8
2013	1	293	36.625	48	8
2013	1	348	43.5	54	9
2013	1	300	37.5	64	10.6667
2013	1	92	11.5	72	12
2013	1	116	14.5	72	12
2013	1	146	18.25	72	12
2013	1	176	22	72	12
2013	1	464	58	72	12
2013	1	251	31.375	78	13
2013	1	256	32	84	14
2013	1	256	32	91	15.1667
2013	1	144	18	92	15.3333
2013	1	375	46.875	93	15.5
2013	1	174	21.75	96	16
2013	1	246	30.75	96	16
2013	1	562	70.25	102	17
2013	1	376	47	106	17.6667
2013	1	490	61.25	112	18.6667
2013	1	146	18.25	120	20
2013	1	220	27.5	121	20.1667
2013	1	72	9	126	21
2013	1	331	41.375	132	22
2013	1	498	62.25	132	22
2013	1	270	33.75	138	23
2013	1	1159	144.875	138	23
2013	1	229	28.625	140	23.3333
2013	1	385	48.125	146	24.3333
2013	1	174	21.75	148	24.6667
2013	1	212	26.5	148	24.6667
2013	1	686	85.75	150	25
2013	1	306	38.25	152	25.3333
2013	1	1060	132.5	158	26.3333
2013	1	401	50.125	161	26.8333
2013	1	550	68.75	166	27.6667
2013	1	144	18	168	28
2013	1	384	48	168	28
2013	1	761	95.125	168	28
2013	1	494	61.75	170	28.3333
2013	1	540	67.5	174	29
2013	1	263	32.875	178	29.6667
2013	1	316	39.5	184	30.6667
2013	1	690	86.25	184	30.6667
2013	1	498	62.25	192	32
2013	1	945	118.125	192	32
2013	1	260	32.5	194	32.3333
2013	1	958	119.75	196	32.6667
2013	1	130	16.25	202	33.6667
2013	1	188	23.5	213	35.5
2013	1	620	77.5	216	36
2013	1	172	21.5	220	36.6667
2013	1	486	60.75	220	36.6667
2013	1	344	43	226	37.6667
2013	1	366	45.75	228	38
2013	1	357	44.625	232	38.6667
2013	1	420	52.5	232	38.6667
2013	1	430	53.75	234	39
2013	1	184	23	237	39.5
2013	1	363	45.375	237	39.5
2013	1	384	48	238	39.6667
2013	1	136	17	240	40
2013	1	362	45.25	250	41.6667
2013	1	378	47.25	250	41.6667
2013	1	329	41.125	254	42.3333
2013	1	481	60.125	260	43.3333
2013	1	367	45.875	263	43.8333
2013	1	398	49.75	264	44
2013	1	639	79.875	265	44.1667
2013	1	274	34.25	270	45
2013	1	549	68.625	270	45
2013	1	597	74.625	270	45
2013	1	268	33.5	282	47
2013	1	24	3	283	47.1667
2013	1	618	77.25	284	47.3333
2013	1	304	38	286	47.6667
2013	1	340	42.5	286	47.6667
2013	1	300	37.5	290	48.3333
2013	1	376	47	296	49.3333
2013	1	536	67	308	51.3333
2013	1	666	83.25	308	51.3333
2013	1	292	36.5	310	51.6667
2013	1	428	53.5	311	51.8333
2013	1	388	48.5	312	52
2013	1	212	26.5	316	52.6667
2013	1	335	41.875	316	52.6667
2013	1	517	64.625	318	53
2013	1	493	61.625	319	53.1667
2013	1	717	89.625	334	55.6667
2013	1	194	24.25	341	56.8333
2013	1	106	13.25	342	57
2013	1	529	66.125	344	57.3333
2013	1	695	86.875	345	57.5
2013	1	580	72.5	346	57.6667
2013	1	827	103.375	350	58.3333
2013	1	508	63.5	352	58.6667
2013	1	417	52.125	354	59
2013	1	640	80	355	59.1667
2013	1	334	41.75	360	60
2013	1	475	59.375	360	60
2013	1	380	47.5	362	60.3333
2013	1	400	50	364	60.6667
2013	1	513	64.125	364	60.6667
2013	1	589	73.625	366	61
2013	1	423	52.875	367	61.1667
2013	1	724	90.5	369	61.5
2013	1	735	91.875	370	61.6667
2013	1	506	63.25	374	62.3333
2013	1	310	38.75	380	63.3333
2013	1	832	104	381	63.5
2013	1	435	54.375	384	64
2013	1	496	62	388	64.6667
2013	1	654	81.75	388	64.6667
2013	1	665	83.125	395	65.8333
2013	1	598	74.75	396	66
2013	1	672	84	396	66
2013	1	824	103	398	66.3333
2013	1	482	60.25	400	66.6667
2013	1	375	46.875	404	67.3333
2013	1	561	70.125	405	67.5
2013	1	593	74.125	409	68.1667
2013	1	716	89.5	409	68.1667
2013	1	728	91	409	68.1667
2013	1	484	60.5	414	69
2013	1	691	86.375	423	70.5
2013	1	270	33.75	424	70.6667
2013	1	545	68.125	424	70.6667
2013	1	489	61.125	426	71
2013	1	660	82.5	426	71
2013	1	407	50.875	432	72
2013	1	858	107.25	434	72.3333
2013	1	493	61.625	435	72.5
2013	1	392	49	439	73.1667
2013	1	260	32.5	442	73.6667
2013	1	310	38.75	442	73.6667
2013	1	926	115.75	447	74.5
2013	1	440	55	448	74.6667
2013	1	689	86.125	452	75.3333
2013	1	782	97.75	454	75.6667
2013	1	974	121.75	457	76.1667
2013	1	788	98.5	458	76.3333
2013	1	167	20.875	461	76.8333
2013	1	992	124	467	77.8333
2013	1	702	87.75	478	79.6667
2013	1	734	91.75	481	80.1667
2013	1	681	85.125	485	80.8333
2013	1	542	67.75	486	81
2013	1	366	45.75	488	81.3333
2013	1	408	51	492	82
2013	1	572	71.5	496	82.6667
2013	1	759	94.875	496	82.6667
2013	1	700	87.5	498	83
2013	1	906	113.25	502	83.6667
2013	1	1145	143.125	506	84.3333
2013	1	768	96	507	84.5
2013	1	708	88.5	512	85.3333
2013	1	665	83.125	513	85.5
2013	1	734	91.75	520	86.6667
2013	1	1289	161.125	520	86.6667
2013	1	578	72.25	528	88
2013	1	595	74.375	530	88.3333
2013	1	511	63.875	538	89.6667
2013	1	792	99	544	90.6667
2013	1	592	74	545	90.8333
2013	1	598	74.75	547	91.1667
2013	1	1105	138.125	550	91.6667
2013	1	1048	131	554	92.3333
2013	1	918	114.75	559	93.1667
2013	1	832	104	564	94
2013	1	506	63.25	567	94.5
2013	1	899	112.375	589	98.1667
2013	1	858	107.25	590	98.3333
2013	1	809	101.125	596	99.3333
2013	1	1042	130.25	596	99.3333
2013	1	688	86	600	100
2013	1	839	104.875	601	100.167
2013	1	268	33.5	608	101.333
2013	1	987	123.375	608	101.333
2013	1	739	92.375	609	101.5
2013	1	828	103.5	611	101.833
2013	1	728	91	613	102.167
2013	1	1358	169.75	616	102.667
2013	1	937	117.125	619	103.167
2013	1	862	107.75	623	103.833
2013	1	843	105.375	628	104.667
2013	1	893	111.625	631	105.167
2013	1	993	124.125	636	106
2013	1	358	44.75	637	106.167
2013	1	958	119.75	639	106.5
2013	1	765	95.625	644	107.333
2013	1	1301	162.625	645	107.5
2013	1	1212	151.5	647	107.833
2013	1	1013	126.625	659	109.833
2013	1	447	55.875	660	110
2013	1	620	77.5	669	111.5
2013	1	893	111.625	670	111.667
2013	1	818	102.25	676	112.667
2013	1	1250	156.25	678	113
2013	1	704	88	686	114.333
2013	1	962	120.25	689	114.833
2013	1	708	88.5	696	116
2013	1	955	119.375	702	117
2013	1	769	96.125	709	118.167
2013	1	751	93.875	711	118.5
2013	1	653	81.625	715	119.167
2013	1	1020	127.5	719	119.833
2013	1	718	89.75	720	120
2013	1	757	94.625	724	120.667
2013	1	458	57.25	726	121
2013	1	1135	141.875	728	121.333
2013	1	769	96.125	730	121.667
2013	1	625	78.125	741	123.5
2013	1	738	92.25	742	123.667
2013	1	972	121.5	754	125.667
2013	1	650	81.25	755	125.833
2013	1	969	121.125	756	126
2013	1	746	93.25	762	127
2013	1	749	93.625	766	127.667
2013	1	668	83.5	775	129.167
2013	1	951	118.875	782	130.333
2013	1	1053	131.625	784	130.667
2013	1	466	58.25	789	131.5
2013	1	826	103.25	798	133
2013	1	611	76.375	803	133.833
2013	1	1293	161.625	817	136.167
2013	1	522	65.25	818	136.333
2013	1	1386	173.25	818	136.333
2013	1	699	87.375	820	136.667
2013	1	714	89.25	822	137
2013	1	796	99.5	824	137.333
2013	1	1015	126.875	834	139
2013	1	840	105	836	139.333
2013	1	1049	131.125	838	139.667
2013	1	750	93.75	854	142.333
2013	1	1080	135	883	147.167
2013	1	959	119.875	890	148.333
2013	1	1034	129.25	893	148.833
2013	1	763	95.375	900	150
2013	1	999	124.875	903	150.5
2013	1	935	116.875	905	150.833
2013	1	1017	127.125	914	152.333
2013	1	711	88.875	915	152.5
2013	1	728	91	936	156
2013	1	826	103.25	940	156.667
2013	1	1131	141.375	948	158
2013	1	1495	186.875	953	158.833
2013	1	827	103.375	972	162
2013	1	1276	159.5	972	162
2013	1	558	69.75	984	164
2013	1	1629	203.625	1006	167.667
2013	1	1012	126.5	1009	168.167
2013	1	934	116.75	1016	169.333
2013	1	1046	130.75	1027	171.167
2013	1	1091	136.375	1030	171.667
2013	1	1679	209.875	1046	174.333
2013	1	1744	218	1050	175
2013	1	1204	150.5	1070	178.333
2013	1	1200	150	1078	179.667
2013	1	1891	236.375	1090	181.667
2013	1	1039	129.875	1094	182.333
2013	1	1205	150.625	1094	182.333
2013	1	783	97.875	1109	184.833
2013	1	1107	138.375	1111	185.167
2013	1	847	105.875	1116	186
2013	1	1376	172	1130	188.333
2013	1	2061	257.625	1149	191.5
2013	1	573	71.625	1159	193.167
2013	1	1372	171.5	1181	196.833
2013	1	1272	159	1218	203
2013	1	673	84.125	1339	223.167
2013	1	965	120.625	1372	228.667
2013	1	1916	239.5	1380	230
2013	1	1426	178.25	1383	230.5
2013	1	1346	168.25	1446	241
2013	1	1533	191.625	1511	251.833
2013	1	1634	204.25	1534	255.667
2013	1	1987	248.375	1632	272
2013	1	1690	211.25	1657	276.167
2013	1	1782	222.75	1857	309.5
2013	1	2170	271.25	1977	329.5
2013	1	1645	205.625	2006	334.333
2013	1	1514	189.25	2100	350
2013	1	2816	352	2232	372
2013	1	1221	152.625	2346	391
2013	1	2800	350	2648	441.333
2013	30	94	11.75	0	0
2013	30	101	12.625	24	4
2013	30	105	13.125	24	4
2013	30	116	14.5	24	4
2013	30	126	15.75	24	4
2013	30	168	21	24	4
2013	30	168	21	24	4
2013	30	200	25	24	4
2013	30	125	15.625	27	4.5
2013	30	414	51.75	42	7
2013	30	72	9	48	8
2013	30	78	9.75	48	8
2013	30	130	16.25	48	8
2013	30	178	22.25	58	9.66667
2013	30	226	28.25	58	9.66667
2013	30	288	36	66	11
2013	30	411	51.375	68	11.3333
2013	30	116	14.5	72	12
2013	30	146	18.25	72	12
2013	30	190	23.75	72	12
2013	30	198	24.75	72	12
2013	30	214	26.75	72	12
2013	30	146	18.25	78	13
2013	30	140	17.5	82	13.6667
2013	30	691	86.375	82	13.6667
2013	30	566	70.75	84	14
2013	30	274	34.25	88	14.6667
2013	30	120	15	90	15
2013	30	156	19.5	90	15
2013	30	235	29.375	90	15
2013	30	164	20.5	96	16
2013	30	562	70.25	98	16.3333
2013	30	144	18	99	16.5
2013	30	530	66.25	99	16.5
2013	30	434	54.25	105	17.5
2013	30	48	6	111	18.5
2013	30	144	18	114	19
2013	30	246	30.75	118	19.6667
2013	30	171	21.375	120	20
2013	30	196	24.5	120	20
2013	30	370	46.25	120	20
2013	30	204	25.5	132	22
2013	30	265	33.125	142	23.6667
2013	30	106	13.25	144	24
2013	30	288	36	144	24
2013	30	460	57.5	144	24
2013	30	490	61.25	144	24
2013	30	204	25.5	150	25
2013	30	303	37.875	150	25
2013	30	232	29	154	25.6667
2013	30	156	19.5	156	26
2013	30	436	54.5	158	26.3333
2013	30	480	60	163	27.1667
2013	30	340	42.5	168	28
2013	30	477	59.625	172	28.6667
2013	30	335	41.875	174	29
2013	30	477	59.625	174	29
2013	30	345	43.125	180	30
2013	30	348	43.5	182	30.3333
2013	30	327	40.875	184	30.6667
2013	30	308	38.5	186	31
2013	30	72	9	192	32
2013	30	612	76.5	196	32.6667
2013	30	177	22.125	200	33.3333
2013	30	163	20.375	204	34
2013	30	231	28.875	207	34.5
2013	30	397	49.625	210	35
2013	30	490	61.25	210	35
2013	30	693	86.625	210	35
2013	30	98	12.25	211	35.1667
2013	30	378	47.25	212	35.3333
2013	30	234	29.25	213	35.5
2013	30	342	42.75	214	35.6667
2013	30	200	25	216	36
2013	30	314	39.25	216	36
2013	30	425	53.125	216	36
2013	30	354	44.25	219	36.5
2013	30	184	23	224	37.3333
2013	30	355	44.375	224	37.3333
2013	30	607	75.875	224	37.3333
2013	30	313	39.125	228	38
2013	30	330	41.25	234	39
2013	30	334	41.75	234	39
2013	30	456	57	237	39.5
2013	30	427	53.375	242	40.3333
2013	30	220	27.5	250	41.6667
2013	30	432	54	250	41.6667
2013	30	619	77.375	252	42
2013	30	408	51	262	43.6667
2013	30	1224	153	262	43.6667
2013	30	308	38.5	265	44.1667
2013	30	400	50	269	44.8333
2013	30	382	47.75	275	45.8333
2013	30	317	39.625	276	46
2013	30	412	51.5	278	46.3333
2013	30	734	91.75	278	46.3333
2013	30	583	72.875	280	46.6667
2013	30	394	49.25	286	47.6667
2013	30	583	72.875	290	48.3333
2013	30	372	46.5	292	48.6667
2013	30	402	50.25	292	48.6667
2013	30	234	29.25	294	49
2013	30	690	86.25	298	49.6667
2013	30	728	91	301	50.1667
2013	30	484	60.5	304	50.6667
2013	30	370	46.25	315	52.5
2013	30	1132	141.5	324	54
2013	30	224	28	325	54.1667
2013	30	857	107.125	326	54.3333
2013	30	425	53.125	327	54.5
2013	30	244	30.5	329	54.8333
2013	30	280	35	330	55
2013	30	472	59	333	55.5
2013	30	259	32.375	338	56.3333
2013	30	501	62.625	338	56.3333
2013	30	395	49.375	347	57.8333
2013	30	162	20.25	352	58.6667
2013	30	581	72.625	352	58.6667
2013	30	575	71.875	353	58.8333
2013	30	454	56.75	355	59.1667
2013	30	522	65.25	356	59.3333
2013	30	239	29.875	357	59.5
2013	30	348	43.5	358	59.6667
2013	30	464	58	358	59.6667
2013	30	1647	205.875	358	59.6667
2013	30	561	70.125	360	60
2013	30	599	74.875	360	60
2013	30	282	35.25	366	61
2013	30	644	80.5	368	61.3333
2013	30	889	111.125	369	61.5
2013	30	628	78.5	376	62.6667
2013	30	556	69.5	382	63.6667
2013	30	660	82.5	382	63.6667
2013	30	394	49.25	384	64
2013	30	647	80.875	387	64.5
2013	30	369	46.125	390	65
2013	30	356	44.5	391	65.1667
2013	30	772	96.5	392	65.3333
2013	30	947	118.375	396	66
2013	30	244	30.5	398	66.3333
2013	30	298	37.25	404	67.3333
2013	30	682	85.25	404	67.3333
2013	30	675	84.375	410	68.3333
2013	30	551	68.875	412	68.6667
2013	30	436	54.5	425	70.8333
2013	30	874	109.25	426	71
2013	30	330	41.25	427	71.1667
2013	30	494	61.75	433	72.1667
2013	30	457	57.125	436	72.6667
2013	30	958	119.75	436	72.6667
2013	30	694	86.75	438	73
2013	30	663	82.875	439	73.1667
2013	30	713	89.125	439	73.1667
2013	30	1092	136.5	440	73.3333
2013	30	796	99.5	442	73.6667
2013	30	484	60.5	444	74
2013	30	501	62.625	446	74.3333
2013	30	518	64.75	449	74.8333
2013	30	631	78.875	452	75.3333
2013	30	897	112.125	456	76
2013	30	604	75.5	458	76.3333
2013	30	1214	151.75	458	76.3333
2013	30	674	84.25	460	76.6667
2013	30	464	58	462	77
2013	30	413	51.625	463	77.1667
2013	30	662	82.75	466	77.6667
2013	30	146	18.25	468	78
2013	30	981	122.625	468	78
2013	30	1038	129.75	474	79
2013	30	1090	136.25	475	79.1667
2013	30	801	100.125	490	81.6667
2013	30	867	108.375	493	82.1667
2013	30	719	89.875	494	82.3333
2013	30	773	96.625	494	82.3333
2013	30	1264	158	507	84.5
2013	30	775	96.875	513	85.5
2013	30	833	104.125	521	86.8333
2013	30	1009	126.125	528	88
2013	30	513	64.125	533	88.8333
2013	30	873	109.125	534	89
2013	30	560	70	536	89.3333
2013	30	938	117.25	540	90
2013	30	766	95.75	541	90.1667
2013	30	362	45.25	542	90.3333
2013	30	807	100.875	542	90.3333
2013	30	995	124.375	544	90.6667
2013	30	727	90.875	547	91.1667
2013	30	1037	129.625	556	92.6667
2013	30	1019	127.375	565	94.1667
2013	30	990	123.75	566	94.3333
2013	30	880	110	570	95
2013	30	653	81.625	574	95.6667
2013	30	545	68.125	576	96
2013	30	758	94.75	582	97
2013	30	577	72.125	583	97.1667
2013	30	689	86.125	587	97.8333
2013	30	752	94	590	98.3333
2013	30	976	122	590	98.3333
2013	30	933	116.625	593	98.8333
2013	30	822	102.75	604	100.667
2013	30	156	19.5	606	101
2013	30	734	91.75	620	103.333
2013	30	1319	164.875	624	104
2013	30	765	95.625	626	104.333
2013	30	545	68.125	632	105.333
2013	30	816	102	633	105.5
2013	30	698	87.25	637	106.167
2013	30	690	86.25	639	106.5
2013	30	1192	149	643	107.167
2013	30	1171	146.375	658	109.667
2013	30	1148	143.5	659	109.833
2013	30	1036	129.5	661	110.167
2013	30	577	72.125	663	110.5
2013	30	670	83.75	669	111.5
2013	30	778	97.25	674	112.333
2013	30	938	117.25	683	113.833
2013	30	1276	159.5	685	114.167
2013	30	901	112.625	696	116
2013	30	452	56.5	698	116.333
2013	30	202	25.25	702	117
2013	30	516	64.5	704	117.333
2013	30	603	75.375	704	117.333
2013	30	666	83.25	708	118
2013	30	468	58.5	712	118.667
2013	30	1285	160.625	716	119.333
2013	30	969	121.125	723	120.5
2013	30	1168	146	729	121.5
2013	30	1038	129.75	733	122.167
2013	30	738	92.25	736	122.667
2013	30	1015	126.875	741	123.5
2013	30	808	101	749	124.833
2013	30	780	97.5	755	125.833
2013	30	407	50.875	759	126.5
2013	30	753	94.125	761	126.833
2013	30	955	119.375	765	127.5
2013	30	898	112.25	771	128.5
2013	30	1042	130.25	775	129.167
2013	30	684	85.5	778	129.667
2013	30	521	65.125	793	132.167
2013	30	451	56.375	794	132.333
2013	30	879	109.875	796	132.667
2013	30	975	121.875	798	133
2013	30	1018	127.25	804	134
2013	30	822	102.75	805	134.167
2013	30	1320	165	812	135.333
2013	30	1112	139	815	135.833
2013	30	1244	155.5	816	136
2013	30	200	25	817	136.167
2013	30	1078	134.75	833	138.833
2013	30	934	116.75	838	139.667
2013	30	1179	147.375	845	140.833
2013	30	704	88	856	142.667
2013	30	885	110.625	862	143.667
2013	30	950	118.75	863	143.833
2013	30	758	94.75	866	144.333
2013	30	908	113.5	878	146.333
2013	30	942	117.75	880	146.667
2013	30	536	67	882	147
2013	30	1071	133.875	886	147.667
2013	30	1123	140.375	896	149.333
2013	30	1094	136.75	908	151.333
2013	30	1008	126	926	154.333
2013	30	751	93.875	935	155.833
2013	30	1256	157	941	156.833
2013	30	944	118	954	159
2013	30	558	69.75	957	159.5
2013	30	859	107.375	959	159.833
2013	30	934	116.75	965	160.833
2013	30	675	84.375	980	163.333
2013	30	994	124.25	982	163.667
2013	30	936	117	1033	172.167
2013	30	1176	147	1055	175.833
2013	30	1129	141.125	1059	176.5
2013	30	1278	159.75	1060	176.667
2013	30	1960	245	1060	176.667
2013	30	1226	153.25	1080	180
2013	30	1440	180	1085	180.833
2013	30	1383	172.875	1089	181.5
2013	30	1218	152.25	1117	186.167
2013	30	1406	175.75	1119	186.5
2013	30	1304	163	1121	186.833
2013	30	1471	183.875	1137	189.5
2013	30	863	107.875	1140	190
2013	30	1216	152	1144	190.667
2013	30	512	64	1154	192.333
2013	30	1492	186.5	1161	193.5
2013	30	1674	209.25	1168	194.667
2013	30	1234	154.25	1178	196.333
2013	30	2162	270.25	1183	197.167
2013	30	995	124.375	1198	199.667
2013	30	860	107.5	1226	204.333
2013	30	959	119.875	1230	205
2013	30	1519	189.875	1279	213.167
2013	30	1266	158.25	1281	213.5
2013	30	3712	464	1323	220.5
2013	30	1026	128.25	1430	238.333
2013	30	1875	234.375	1430	238.333
2013	30	1511	188.875	1434	239
2013	30	2046	255.75	1440	240
2013	30	1695	211.875	1446	241
2013	30	1786	223.25	1547	257.833
2013	30	1250	156.25	1575	262.5
2013	30	1645	205.625	1580	263.333
2013	30	1302	162.75	1672	278.667
2013	30	1770	221.25	1677	279.5
2013	30	1861	232.625	1702	283.667
2013	30	761	95.125	1703	283.833
2013	30	2434	304.25	1845	307.5
2013	30	2890	361.25	2421	403.5
2013	30	3380	422.5	2447	407.833
2013	30	2395	299.375	2463	410.5
